# Supplementary material
Source: HighWire-hosted journal article supplement (http://www.qdcxjkg.com/highwire/filestream/113411/field_highwire_adjunct_files/0/Vit_D_COPD_Online_supp_3-4-12.pdf)
Supplement: Vit_D_COPD_Online_supp_3-4-12.pdf [file Vit_D_COPD_Online_supp_3-4-12.pdf]

## **Vitamin D and skeletal muscle strength and endurance in chronic obstructive pulmonary disease**

Abigail S Jackson<sup>1</sup>, Dinesh Shrikrishna<sup>1</sup>, Julia L Kelly<sup>1</sup>, Nicholas Hart<sup>2</sup>, John Moxham<sup>3</sup>, Michael I Polkey<sup>1</sup>, Paul Kemp<sup>1</sup>, Nicholas S Hopkinson<sup>1</sup>

<sup>1</sup>Muscle Laboratory, NIHR Respiratory Disease Biomedical Research Unit at the Royal Brompton and Harefield NHS Foundation Trust and Imperial College, London.

<sup>2</sup>Guy's & St Thomas' NHS Foundation Trust and Kings College London National Institute of Health Research Comprehensive Biomedical Research Centre, London, UK

<sup>3</sup>Respiratory Muscle Laboratory, King's College London School of Medicine, King's College Hospital, Bessemer Road, London SE5 9PJ

### **Corresponding author:**

Dr Nicholas Hopkinson; NIHR Respiratory Disease Biomedical Research Unit at the Royal Brompton and Harefield NHS Foundation Trust and Imperial College, London, Royal Brompton Hospital, Fulham Road, London, SW3 6NP     [n.hopkinson@ic.ac.uk](mailto:n.hopkinson@ic.ac.uk)

tel 02073497775; fax 02073497778

## **SUBJECTS AND METHODS**

Stable COPD patients were recruited opportunistically as they attended hospital outpatient clinics and also those on the department's clinical database were invited to participate. Control subjects were recruited by advertisement and through local community groups. Subjects were excluded if they had significant co-morbidities for example unstable cardiovascular disease, malignancy or limiting musculoskeletal disorders. Study participants were sampled throughout the year, and there was no difference in the time of year measured between the patient and control groups. All subjects provided informed written consent and the study was approved by the Ethics Committee of The Royal Brompton Hospital.

A systematic history including exacerbation rate and average daily dose (ADD) of oral corticosteroids in the preceding year was obtained. Vitamin D intake was assessed with a standardised recall questionnaire developed by ourselves, based on known dietary sources of vitamin D.[1] We did not exclude patients on vitamin D supplements so that our study group would represent a normal, unselected clinic population. The Yale physical activity survey (YPAS) [2] and the St George's Respiratory Questionnaire (SGRQ) were completed.

Fat Free Mass (FFM) was measured with a Bodystat 1500 bioelectrical impedance device using a disease specific regression equation in COPD patients [3] and the device's internal algorithm for controls. Spirometry, plethysmographic lung volumes and gas transfer were obtained in COPD patients using a CompactLab system (Jaeger, Würzburg, Germany). Only spirometry was measured in control subjects.

### **Muscle strength and endurance**

Maximum isometric quadriceps force (QMVC) and handgrip strength were measured as previously described.[4] Unpotentiated twitch quadriceps force (TwQ) was assessed by

magnetic femoral nerve stimulation, using two Magstim 200 monopulse units discharged simultaneously through a 70mm branding iron coil.[5] A stimulus response curve was generated to ensure supramaximality of stimulation and the mean of at least 5 stimulations at 100% stimulator output was taken.

Quadriceps endurance was measured using repetitive magnetic stimulation with a Magstim Rapid 2 stimulator and a flexible mat coil placed over the body of the quadriceps.[6] Stimuli were delivered at a frequency of 30 Hz with a duty cycle of 0.4 (2s on, 3s off) for 60 trains. The stimulator intensity was adjusted for each subject initially to generate 20% of their supine QMVC. Decay in force produced by consecutive trains was used as an index of endurance. Endurance curves were compared between COPD and control groups, and vitamin D sufficient and insufficient subjects within groups. Vitamin D insufficiency was defined as 25(OH)D levels of <75nmol/l.

Sniff nasal inspiratory pressure (SNIP) was measured through a plug occluding one nostril during a maximal sniff performed through the contralateral nostril.[7]

### **Serum measurements**

Serum was stored and batch analysis of calcidiol - 25(OH)D, calcitriol - 1,25(OH)<sub>2</sub>D, hsCRP, IL6, electrolytes and albumin was performed following study completion. Serum 25(OH)D was measured by radioimmunoassay procedure after acetonitrile extraction (25-hydroxyvitaminD RIA; Immunodiagnostic Systems, Boldon, Tyne and Wear). 1,25(OH)<sub>2</sub>D was measured by enzyme immunoassay after immunoextraction (1,25-DihydroxyVitaminD EIA; Immunodiagnostic systems, Boldon, Tyne and Wear).

### **Muscle biopsy**

Muscle biopsy samples were taken from the vastus lateralis of the dominant leg.[6] Informed consent was obtained. Local anaesthetic was infiltrated and a 1cm incision was made in the

skin. A Bergstrom needle was then used to obtain the muscle sample. Tissue was snap frozen in liquid nitrogen and subsequently stored at  $-80^{\circ}\text{C}$  for later analysis.

For real-time quantitative PCR (RT-qPCR), RNA was extracted from muscle biopsies using trizol (Sigma, UK) as per the manufacturer's recommendations. The concentration of RNA was quantified using a spectrophotometer (Nanodrop ND1000, Wilmington, USA). First strand cDNA was generated using Superscript<sup>®</sup> II Reverse Transcriptase (Invitrogen). RT-qPCR analysis was carried out in duplicate on each cDNA sample for MHC1, MHCIIa, MHCIIx, the myogenic regulatory factors myogenin, mrf4 and myf5, and for the reference housekeeping gene human RPLPO (large ribosomal protein), using a 20  $\mu\text{l}$  reaction of SYBR<sup>®</sup> Green Quantitative PCR Kit (Sigma Aldrich, UK) and the primer pair (4 $\mu\text{mol}$ ) in 96 well plates (MicroAmp, Fast optical 96 well reaction plate (0.1 ml) (Applied Biosystems, UK.). The qPCR reactions were run on the 7500 Fast Real-time PCR System (Applied Biosystems, UK.), with the following cycle program: 95  $^{\circ}\text{C}$  for 10 minutes, then 40 cycles of 95  $^{\circ}\text{C}$  for 15 seconds, 60 $^{\circ}\text{C}$  for 30 seconds, 72 $^{\circ}\text{C}$  for 30 seconds. The PCR products were run on a 2% agarose gel to confirm the size of the product. Messenger RNA levels for all genes of interest were normalised to Human RPLPO mRNA levels and values were log transformed to obtain a normal distribution. Primer sequences are shown in Table 1.

### **Statistical Analysis**

Descriptive statistics are reported as mean (SD) for parametric data, and median (range) for non-parametric data. T tests were used to compare means for parametric data and the Mann-Whitney test for non-parametric data. The Spearman rank test was used for correlations. Stepwise logistic regression was used to establish factors influencing muscle strength. Disease severity was considered in terms of percent predicted; airflow obstruction ( $\text{FEV}_1$ ), gas transfer (TLco) and gas trapping (RV/TLC). Regression with robust variances was used

to compare endurance curves between COPD and control groups, and to compare vitamin D sufficient and insufficient subjects within groups. A p value <0.05 was considered significant. Analysis was performed using SPSS for windows version 16.0 and STATA release 10.1.

### **Vitamin D and lung function in patients and controls**

In the COPD group, 25(OH)D was associated with FVC (%pred) ( $r=0.21$ ,  $p=0.04$ ) but no other measure of lung function, whilst 1,25(OH)<sub>2</sub>D was not associated with any measures of lung function. After stepwise multivariate analysis, number of exacerbations per year, pack years and weight remained independently associated with FEV<sub>1</sub> (%pred) ( $r^2=0.32$ ), whilst number of pack years was independently associated with FVC (%pred) ( $r^2=0.15$ ). Other factors not retained in the models were daily vitamin D intake, season measured, 25(OH)D, 1,25(OH)<sub>2</sub>D, PTH or albumin.

In the control group, 25(OH)D was correlated with FEV<sub>1</sub> (l) ( $r=0.27$ ,  $p=0.006$ ) and FVC (l) ( $r=0.31$ ,  $p=0.002$ ). 1,25(OH)<sub>2</sub>D was correlated with FEV<sub>1</sub> (l) ( $r=0.41$ ,  $p<0.001$ ) and FVC(l) ( $r=0.38$ ,  $p<0.001$ ) as well as FEV<sub>1</sub>(% pred) ( $r=0.25$ ,  $p=0.02$ ). After stepwise multivariate analysis; weight, pack years and 1,25(OH)<sub>2</sub>D remained independently associated with FEV<sub>1</sub>(%pred) ( $r^2=0.22$ ), and weight and 1,25(OH)<sub>2</sub>D remained independently associated with FVC (%pred) ( $r^2=0.22$ ). Other factors not retained in the models were daily vitamin D intake, season measured, 25(OH)D, PTH or albumin.

### **Myogenic factors studied - background**

We chose to look at myogenic regulatory factors as they have been shown to be influenced by 1,25(OH)<sub>2</sub>D in vitro, and have persistent up-regulation in VDR knockout mice.[8] Mrfs have been extensively studied in embryogenesis and in cell culture models where have been shown to play an important role in skeletal muscle development. MyoD and myf5 commit stem cells

to a myogenic lineage whilst myogenin and mrf4 stimulate the transition to multinucleated myofibres.[9] However, less is known of their function in adult muscle. Mrf4 expression does persist into adult life, whilst the other mrfs decrease shortly after birth and subsequently increase with ageing and in disease states.[10] MyoD and myogenin mRNA has been shown to increase after resistance exercise training in both young and old people, whilst myf5 mRNA increased only in the young.[11]

Whilst they clearly have an ongoing role in adult muscle which has yet to be clearly elucidated, the results of our study suggest that mrf4 and myf5 may be important regulators of muscle fibre type. One study in adult rats has demonstrated high levels of myogenin mRNA in muscles that predominantly consist of slow fibres with high levels of myoD mRNA in those that consist predominantly of fast fibres. However, levels of mrf4 mRNA did not differ between muscles, whilst myf5 mRNA was virtually undetectable. [12] Our findings are supported by another study looking at promoter/reporter gene constructs of mrf4 which has shown a region which promotes mrf4 specifically in fast muscle fibres. [13]

## REFERENCES

1. Holick MF. Vitamin D deficiency. *The New England journal of medicine* 2007; 357: 266-281.
2. Dipietro L, Caspersen CJ, Ostfeld AM, Nadel ER. A survey for assessing physical activity among older adults. *Medicine and science in sports and exercise* 1993; 25: 628-642.
3. Schols AM, Wouters EF, Soeters PB, Westerterp KR. Body composition by bioelectrical-impedance analysis compared with deuterium dilution and skinfold

anthropometry in patients with chronic obstructive pulmonary disease. *The American journal of clinical nutrition* 1991; 53: 421-424.

4. Hopkinson NS, Li KW, Kehoe A, Humphries SE, Roughton M, Moxham J, Montgomery H, Polkey MI. Vitamin D receptor genotypes influence quadriceps strength in chronic obstructive pulmonary disease. *The American journal of clinical nutrition* 2008; 87: 385-390.

5. Polkey MI, Kyroussis D, Hamnegard CH, Mills GH, Green M, Moxham J. Quadriceps strength and fatigue assessed by magnetic stimulation of the femoral nerve in man. *Muscle & nerve* 1996; 19: 549-555.

6. Swallow EB, Gosker HR, Ward KA, Moore AJ, Dayer MJ, Hopkinson NS, Schols AM, Moxham J, Polkey MI. A novel technique for nonvolitional assessment of quadriceps muscle endurance in humans. *J Appl Physiol* 2007; 103: 739-746.

7. Heritier F, Rahm F, Pasche P, Fitting JW. Sniff nasal inspiratory pressure. A noninvasive assessment of inspiratory muscle strength. *American journal of respiratory and critical care medicine* 1994; 150: 1678-1683.

8. Endo I, Inoue D, Mitsui T, Umaki Y, Akaike M, Yoshizawa T, Kato S, Matsumoto T. Deletion of vitamin D receptor gene in mice results in abnormal skeletal muscle development with deregulated expression of myoregulatory transcription factors. *Endocrinology* 2003; 144: 5138-5144.

9. Yokoyama S, Asahara H. The myogenic transcriptional network. *Cell Mol Life Sci*; 68: 1843-1849.

10. Stewart CE, Rittweger J. Adaptive processes in skeletal muscle: molecular regulators and genetic influences. *Journal of musculoskeletal & neuronal interactions* 2006; 6: 73-86.

11. Kosek DJ, Kim JS, Petrella JK, Cross JM, Bamman MM. Efficacy of 3 days/wk resistance training on myofiber hypertrophy and myogenic mechanisms in young vs. older adults. *J Appl Physiol* 2006; 101: 531-544.
12. Hughes SM, Taylor JM, Tapscott SJ, Gurley CM, Carter WJ, Peterson CA. Selective accumulation of MyoD and myogenin mRNAs in fast and slow adult skeletal muscle is controlled by innervation and hormones. *Development (Cambridge, England)* 1993; 118: 1137-1147.
13. Pin CL, Konieczny SF. A fast fiber enhancer exists in the muscle regulatory factor 4 gene promoter. *Biochemical and biophysical research communications* 2002; 299: 7-13.



**Table 1: Primer Sequences**

| Gene     | Forward                    | Reverse                 |
|----------|----------------------------|-------------------------|
| RPLPO    | TCTACAACCCTGAAGTGCTTGATATC | GCAGACAGACACTGGCAACATT  |
| MHC1     | CCCTGGAGACTTTGTCTCATTAGG   | AGCTGATGACCAACTTGCGC    |
| MyHCIIa  | TCACTTATGACTTTTGTGTGAACCT  | CAATCTAGCTAAATTCCGCAAGC |
| MyHCIIx  | TGACCTGGGACTCAGCAATG       | GGAGGAACAATCCAACGTCAA   |
| myogenin | GCTGTATGAGACATCCCCCTACTT   | CGTAGCCTGGTGGTTCGAA     |
| mrf4     | CCCCTTCAGCTACAGACCCAA      | CCCCCTGGAATGATCGGAAAC   |
| myf5     | GATGTAGCGGATGGCATTCC       | AGGTCAACCAGGCTTTCGAA    |

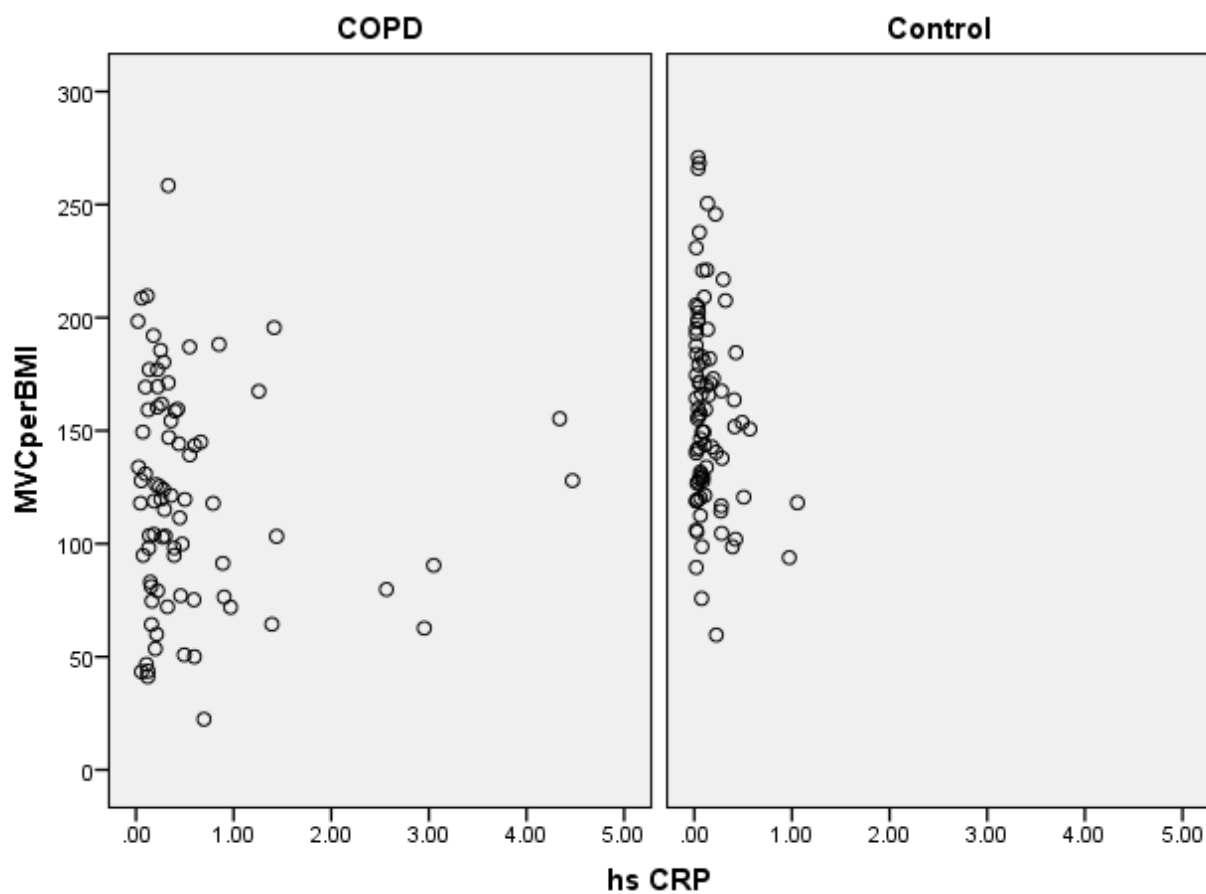

Figure E1 There was no relationship between CRP levels and quadriceps strength in either COPD patients (n=104) or controls (n=100).
